# Supplementary material for: A tRNA processing enzyme is a key regulator of the mitochondrial unfolded protein response
Source: eLife. 2022 Apr 22;11:e71634. doi: 10.7554/eLife.71634 (PMC9064297; doi:10.7554/eLife.71634)
Supplement: Supplementary file 1. [file elife-71634-supp1.xlsx]

## Sheet: Table S1
Supplementary File 1: C. elegans strains
C. elegans strains	Source	Strain Name
C. elegans wild isolate	Caenorhabditis Genetics Center	N2
atfs-1(et15)V	Caenorhabditis Genetics Center	QC115
gcn-2(ok871) II	Caenorhabditis Genetics Center	RB967
nuo-6(qm200)I	Caenorhabditis Genetics Center	MQ1333
reSi5 [ges-1p::TIR1::F2A::mTagBFP2::AID*::NLS::tbb-2 3'UTR] (I:-5.32)	Caenorhabditis Genetics Center	DV3803
reSi7 [rgef-1p::TIR1::F2A::mTagBFP2::AID*::NLS::tbb-2 3'UTR] (I:-5.32)	Caenorhabditis Genetics Center	DV3805
tmC25[unc-5(tmIs1241)] IV	Caenorhabditis Genetics Center	FX30203
zcIs4 [hsp-4::GFP] V	Caenorhabditis Genetics Center	SJ4005
zcIs9 [hsp-60::GFP + lin-15(+)]V	Caenorhabditis Genetics Center	SJ4058
zcIs13[hsp-6p::GFP] V	Caenorhabditis Genetics Center	SJ4100
zcIs18[ges-1::GFP(cyt)]	Caenorhabditis Genetics Center	SJ4144
zcIs39[dve-1p::dve-1::GFP]II	Caenorhabditis Genetics Center	SJ4197
atfs-1(et15), zcIs13[hsp-6p::GFP]V	This study	MRP228
nuo-6(qm200)I; zcIs13[hsp-6p::GFP]V	This study	MRP232
hoe-1(mpt13[M1A])IV; zcIs13[hsp-6p::GFP]V	This study	MRP257
hoe-1(mpt14[HOE-1::GFP])IV	This study	MRP258
hoe-1(mpt20[hoe-1[M1A]::GFP])IV	This study	MRP264
hoe-1(mpt31[null])/tmC25 IV	This study	MRP290
hoe-1(mpt31[null])/tmC25 IV; zcIs13[hsp-6p::GFP]V	This study	MRP314
hoe-1(mpt14[HOE-1::GFP])IV; atfs-1(et15)V	This study	MRP330
nuo-6(qm200) I; hoe-1(mpt31[null])/tmC25 IV; zcIs13[hsp-6p::GFP]V	This study	MRP333
hoe-1(mpt51[∆NLS])/tmC25 IV; zcIs13[hsp-6p::GFP]V	This study	MRP335
hoe-1(mpt61[ΔNLS::GFP])/tmC25 IV	This study	MRP341
nuo-6(qm200)I; hoe-1(mpt14[HOE-1::GFP])IV	This study	MRP345
hoe-1(mpt67[ΔNES])/tmC25 IV	This study	MRP372
hoe-1(mpt68[ΔNES::GFP])/tmC25 IV	This study	MRP373
hoe-1(mpt67[ΔNES])/tmC25 IV; zcIs13[hsp-6p::GFP]V	This study	MRP379
hoe-1(mpt67[ΔNES])/tmC25 IV; zcIs18[ges-1::GFP(cyt)]	This study	MRP384
hoe-1(mpt67[ΔNES])/tmC25 IV; zcIs4 [hsp-4::GFP] V	This study	MRP393
ItSi001 II; hoe-1(mpt67[ΔNES])/tmC25 IV	This study	MRP396
gcn-2(ok871) II; zcIs13[hsp-6p::GFP]V	This study	MRP398
gcn-2(ok871) II; hoe-1(mpt67[ΔNES])/tmC25 IV; zcIs13[hsp-6p::GFP]V	This study	MRP411
nuo-6(qm200) I; hoe-1(mpt51[∆NLS])/tmC25 IV; zcIs13[hsp-6p::GFP]V	This study	MRP413
zcIs39[dve-1p::dve-1::GFP]II; hoe-1(mpt67[ΔNES])/tmC25 IV	This study	MRP461
hoe-1(mpt56[D624A])/tmC25 IV; zcIs13[hsp-6p::GFP]V	This study	MRP472
eIF-2alpha(mpt97) I; hoe-1(mpt67)/tmC25 IV; zcIs13[hsp-6p::GFP]V	This study	MRP500
eIF-2alpha(mpt97[S46A,S49A]) I; zcIs13[hsp-6p::GFP]V	This study	MRP503
hoe-1(mpt67[ΔNES])/tmC25 IV; zcIs9 [hsp-60::GFP + lin-15(+)]V	This study	MRP515
reSi5 I, hoe-1(mpt117[ΔNES::degron])/tmC25 IV; zcIs13[hsp-6p::GFP]V	This study	MRP580
reSi7 I, hoe-1(mpt117[ΔNES::degron])/tmC25 IV; zcIs13[hsp-6p::GFP]V	This study	MRP581
hoe-1(mpt117[ΔNES::degron])/tmC25 IV; zcIs13[hsp-6p::GFP]V	This study	MRP582
hoe-1(mpt119[ΔMTS+ΔNES])/tmC25 IV; zcIs13[hsp-6p::GFP]V	This study	MRP583
hoe-1(mpt120[ΔNLS+ΔNES])/tmC25 IV; zcIs13[hsp-6p::GFP]V	This study	MRP585
hoe-1(mpt121[D624A+ΔNES])/tmC25 IV; zcIs13[hsp-6p::GFP]V	This study	MRP586
nuo-6(qm200) I; itSi001 II	This study	MRP601
ItSi001 [ttTi5605, Patfs-1::atfs-1::mCherry::atfs-1_3'UTR, cb-unc119(+)]II	Sasha de Henau
