# Supplementary material for: A tRNA processing enzyme is a key regulator of the mitochondrial unfolded protein response
Source: eLife. 2022 Apr 22;11:e71634. doi: 10.7554/eLife.71634 (PMC9064297; doi:10.7554/eLife.71634)
Supplement: Supplementary file 2. [file elife-71634-supp2.xlsx]

## Sheet: Sheet1
Supplementary File 2: Oligonucleotides
	use/target	sequence
crRNAs
	dpy-10 (Arribere et al. 2014, Genetics)	GCTACCATAGGCACCACGAG
crRNA_JH007	hoe-1(ΔMTS) / 5' for hoe-1(null)	CGAGGAAAACTGTAGAGAAT
crRNA_JH009	hoe-1 C-term tagging / 3' for hoe-1(null)	TGAAAAGCGAGGTCAATTAA
crRNA_JH018	hoe-1(ΔNLS)	ACACCTCCCGGGAGCCCTGG
crRNA_JH024	hoe-1(D624A)	TCTTCAACCAACAAATCACA
crRNA_JH025	hoe-1(ΔNES)	TTACAGAGAAGTATTCGTGG
crRNA_JH029	eIF2alpha(S46A,S49A)	TCACTGAACGGATACGACGA
ssDNA repairs
	dpy-10 (Arribere et al. 2014, Genetics)	CACTTGAACTTCAATACGGCAAGATGAGAATGACTGGAAACCGTACCGCATGCGGTGCCTATGGTAGCGGAGCTTCACATGGCTTCAGACCAACAGCCTAT
repair_JH007	hoe-1(ΔMTS)	aattcaaataaatttcagctgaaagctcgaagctgGCTCTCGGAGCGATTGCGAGGAAAACTGTCGAAAATCGGATTCTgtaagggtttgtgagtggtccccc
repair_JH011	hoe-1(null)	tgATGCTCGGAGCGATTGCGAGGAAAACTGTAGAGTAAAGGCTTGAgtgactggccacattcaacattaa
repair_JH016	hoe-1(ΔNLS)	GTTGATATCTCCAGGTATCCACTAACACCTCCCGGCAGTCCGGGAGGGCCTCCTGGAGCTGCTCCGGCTCTTCCGAGCCCACATCTCCCGCCGAGCAGAGATGT
repair_JH023	hoe-1::degron	ACAAGGAATTGTCTGAAAAGCGAGGTCAATTGAAAGCTCCTAAAGATCCAGCCAAACCTCCGGCCAAGGCACAAGTTGTGGGATGGCCACCGGTGAGATCATACCGGAAGAACGTGATGGTTTCCTGCCAAAAATCAAGCGGTGGCCCGGAGGCGGCGGCGTTCGTGAAGTGAGTGACTGGCCACATTCAACATTAATTC
repair_JH023	hoe-1(D624A)	TGAGAGTTGCTGGAAAACGAATTGTATTCTCTGGAGCTACCAAGCCATGCGATCTTTTGGTTGAAGAAGGAAAAGATGCTGATGTTCTTGT
repair_JH025	hoe-1(ΔNES)	aaataaataaatttataaatttacagAGAAGTATTTGCCGCTGAAGCGGCTGAAGCGACCGCTAAAAAAGAACAACGGGTTTTGAAAGACAAGGAATT
repair_JH032	eIF2alpha(S46A,S49A)	aattaaatcatttttcagAGGGTATGATCCTGCTCGCTGAGCTCGCTCGACGTCGTATCCGTTCAGTGAACAAGCTAATCCGTGTCG
primers
for gene expression
JH037_F	hsp-6 cDNA	CGCTGGAGATAAGATCATCGCTG
JH038_R		CGTTGGTGGACTTGACCTCG
JH039_F	ama-1 cDNA	GTACAATGCGGATTTCGATGGAGATG
JH040_R		GGAGTGATGAGTTGTCTCGGC
JH111_F	atfs-1cDNA	CGAATAGATGAGTACGGAATGCCAC
JH112_R		GTGATTCCATGCCTCCCAATCG
JH267_F	clec-47 cDNA	CCTGTGCTTGGGCAGATTCG
JH268_R		CCCTGCTGTCTCAACAAATACACAG
JH269_F	cyp-14A1 cDNA	GGGTCTCATCAGTGCAAAGAGG
JH270_R		GGATCTTCAAACACTGTGTCATTTCTCATC
JH422_F	hoe-1 (w/ MTS) cDNA	GGAGAGAATTGCCAGAAATCGCC
JH423_R		CCATTGATTGTCGCAGATTTGAGATGC
JH424_F	hoe-1 (total) cDNA	GCATTGTCTACTCGACTTCATGGTG
JH425_R		GGATACTTGCAGCTACCGTAATCC
for genotyping
JH133_F	nuo-6(qm200)	CCGAATTTCTGCCAGGACATGAATAC
JH134_R	follow w/ digest: TaqI cuts mutant	CCCTTGAACTCTCTCGAAAGTCAG
JH183_F	hoe-1(ΔMTS)	GGCATCTCCATCTCTCCCC
JH184_R	follow w/ digest: Cac8I cuts mutant	CCCGTTTTTTCTCAAAACCTGGAG
JH193_wt_F	hoe-1::GFP (JH193-JH195)	GGTGTGGCGATGGATATGTTGAG
JH194_mt_F	hoe-1::degron (JH193/JH194)	GGAAGCGTTCAACTAGCAGACC
JH195_R		GCCTGTATATTTGGTTTTACCGCTAAATACC
JH218_mt_F	hoe-1(null)	GCTGAAAGCTCGAAGCTGATGC
JH219_wt_F		GCCATAATGACCGAATATAACTGTGCTCG
JH220_R		GCTAAATACCTAACGAGACCCAACGG
JH237_F	hoe-1(ΔNLS)	GCTGTCGGATAAAGCGAAGGAATTG
JH238_R	follow w/ digest: BsmA1 cuts WT	GGGGTTTTGGTGTCATATCTACCTCATG
JH275_F	hoe-1(D624A)	CTACAGGATATGTCGAGCAGTTTCG
JH276_R	follow w/ digest: AluI cuts mutant	CCTAGCTACCGTATTTTGGCTAAAAATCTC
JH295_mt_F	gcn-2(ok871)	GCTGATAGTGTATTTGAGAGATCCACTGC
JH296_wt_F		CGGGCATCCACATGAGAGATGG
JH297_R		GTTGTTCGCAATCGTGCTCGG
JH300_F	hoe-1(ΔNES)	CCCATTTTTAGGTAGATTTCAGATTCAGTATTCAGG
JH301_R	follow w/ digest: TaqI cuts WT	CGCTAAATACCTAACGAGACCCAACG
JH311_F	eIF2alpha(S46A,S49A)	GGCACGGAAAAAAGGGAAAAATTCG
JH312_R	follow w/ digest: AatII cuts mutant	GCACTAATATCACACTCATCCAAGATC
JH321_F	itSi001 (mCherry specific primers)	GGCATGAGTTTGAAATTGAAGGTGAAGG
JH322_R		CATTGTACGCTCCTGGCAGC
MP397_F	atfs-1(et15)	GAAACCGCCTCCTTTCGCCTTTTG
MP398_R	follow w/ digest: AatII cuts WT	GACTTCATCGTCGTCCATGGGTACG
for dsDNA repair
JH199_F	primers to amplify GFP from pJA245	GAAAGACAAGGAATTGTCTGAAAAGCGAGGTCAATTGAAAGCTGGAGGTGGAGGTGGAGCTATGAGTAAAGGAGAAGAACT
JH200_R	include HA for hoe-1 and gly5A linker	AAAGTGAATTAATGTTGAATGTGGCCAGTCACTCATTATTTGTATAGTTCGTCCATGC
