# Supplementary figures and images for: A tRNA processing enzyme is a key regulator of the mitochondrial unfolded protein response
Source: eLife journal article supplement (doi:10.7554/elife.71634), 2022-04-22

Figure 2 – figure supplement 3

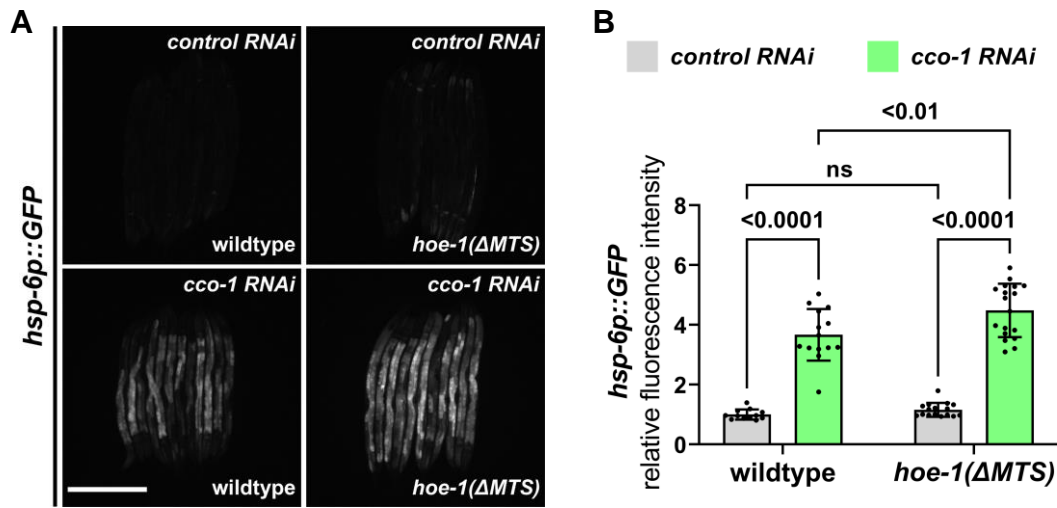

Supplement: supp [file elife-71634-supp-v1.zip]

Figure 6 – figure supplement 2

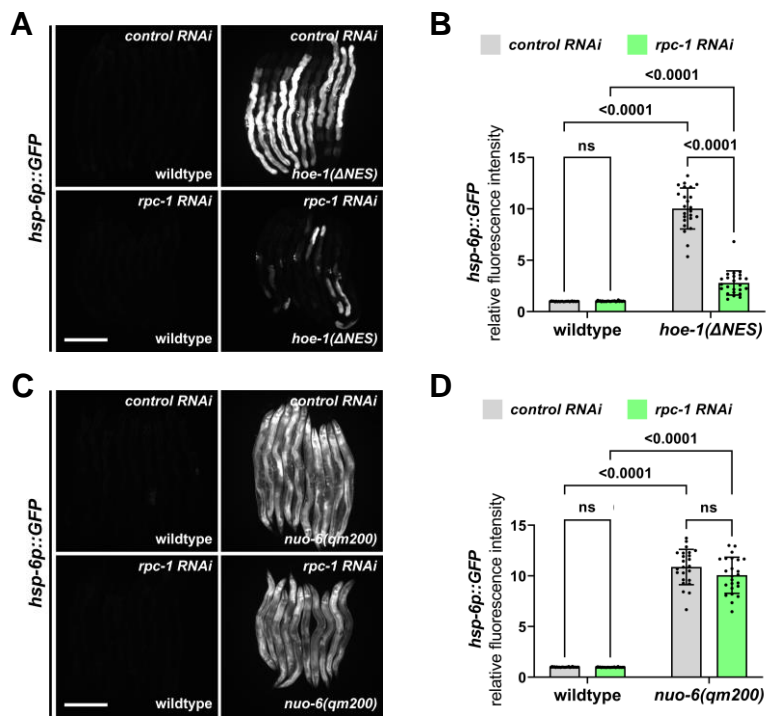

Supplement: supp [file elife-71634-supp-v1.zip]

**Figure 8 – source data 2**

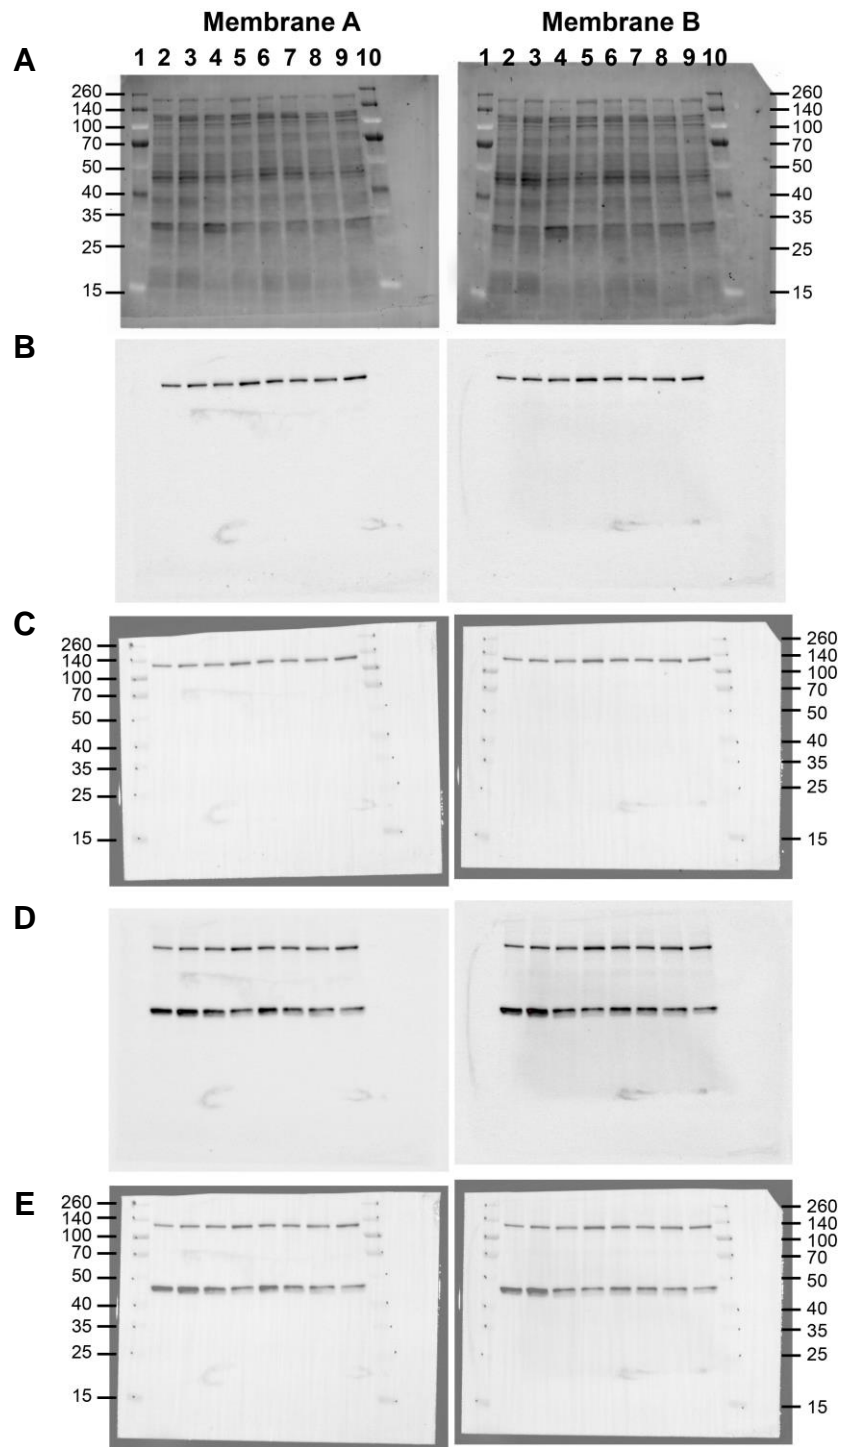

Supplement: supp [file elife-71634-supp-v1.zip]

## Figure 2 – figure supplement 2

A

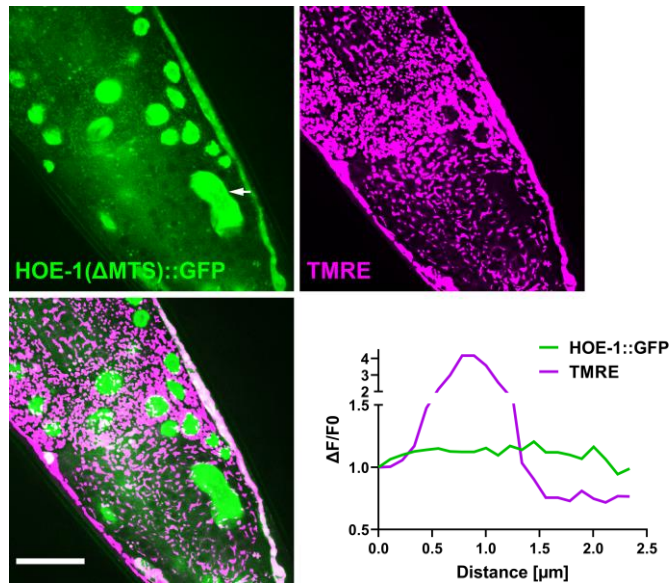

Supplement: supp [file elife-71634-supp-v1.zip]

Figure 3 – figure supplement 1

A

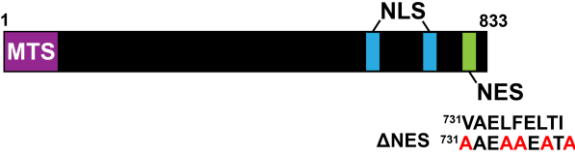

B

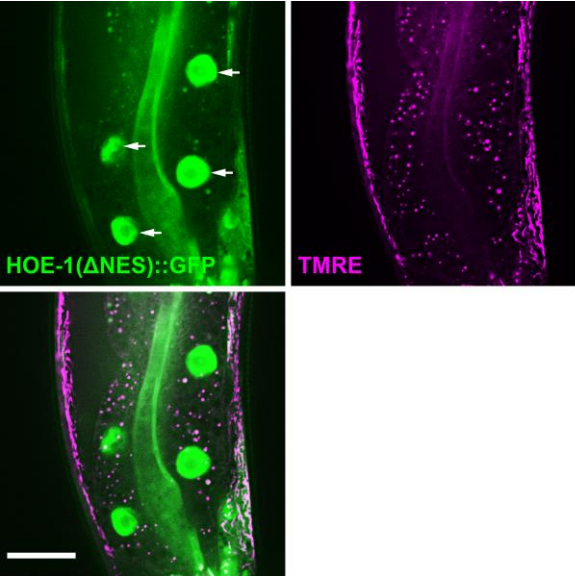

Supplement: supp [file elife-71634-supp-v1.zip]

Figure 8 – figure supplement 4

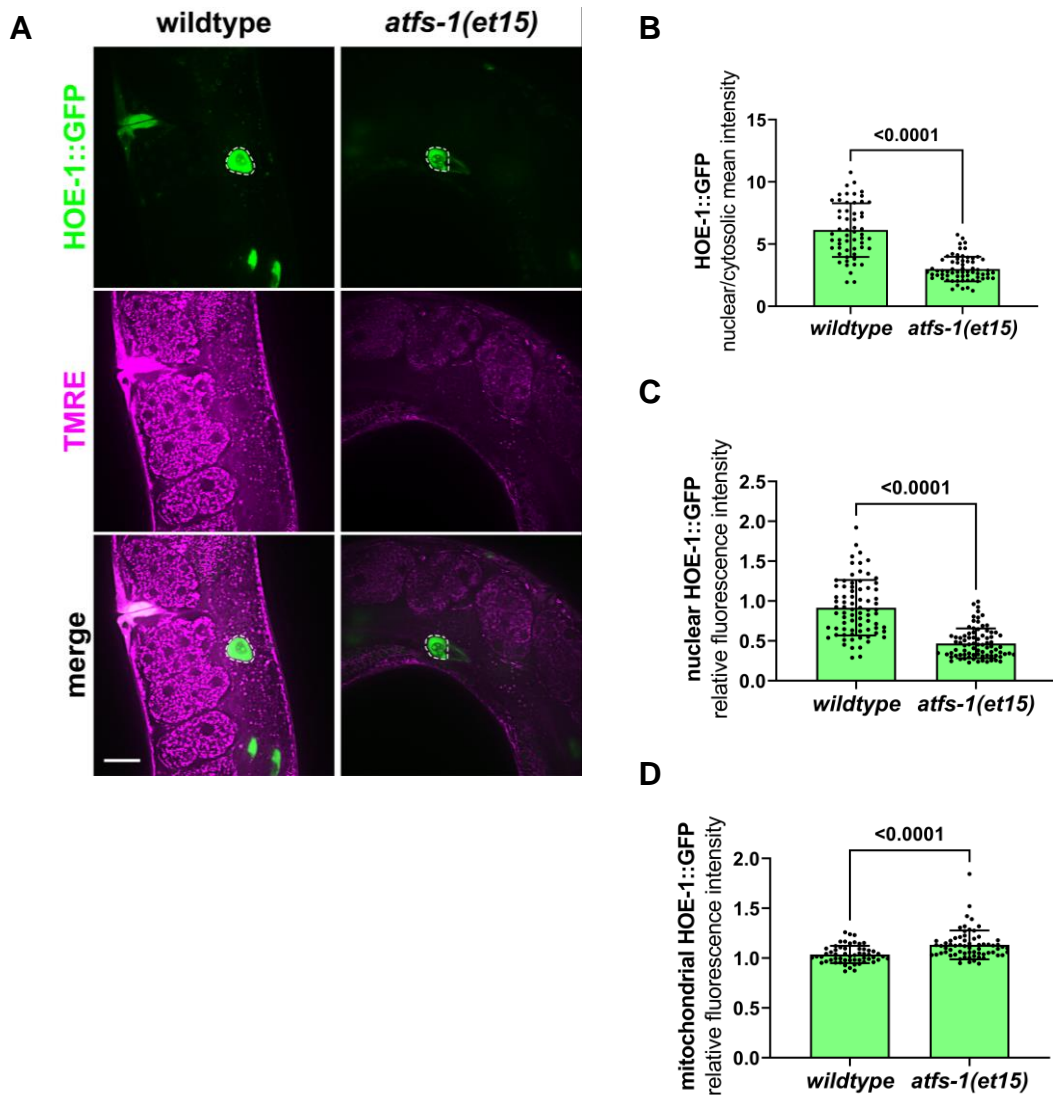

Supplement: supp [file elife-71634-supp-v1.zip]

Figure 8 – figure supplement 3

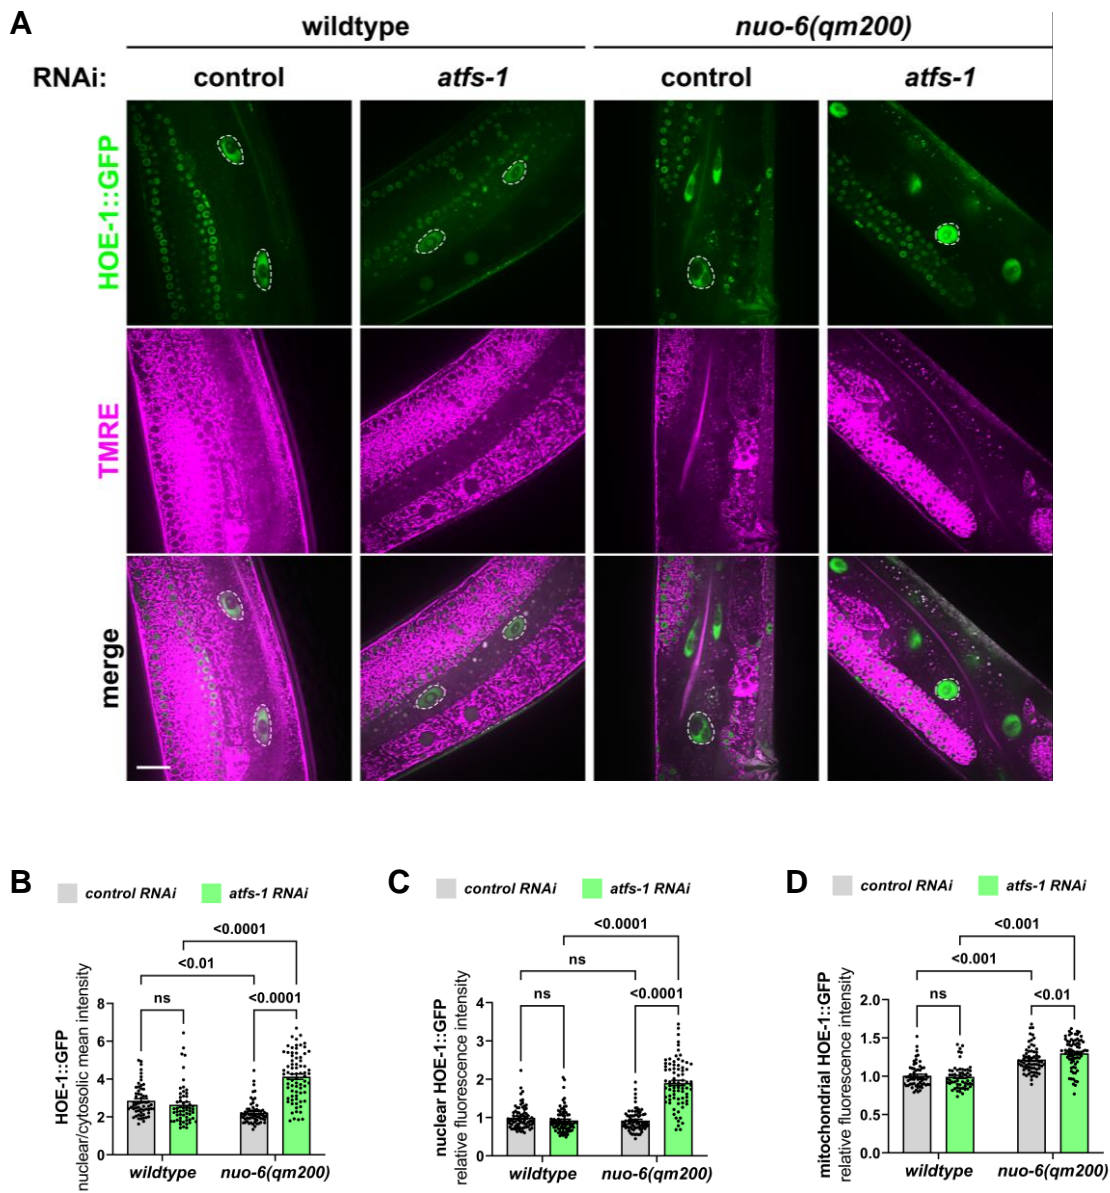

Supplement: supp [file elife-71634-supp-v1.zip]

Figure 6 – figure supplement 1

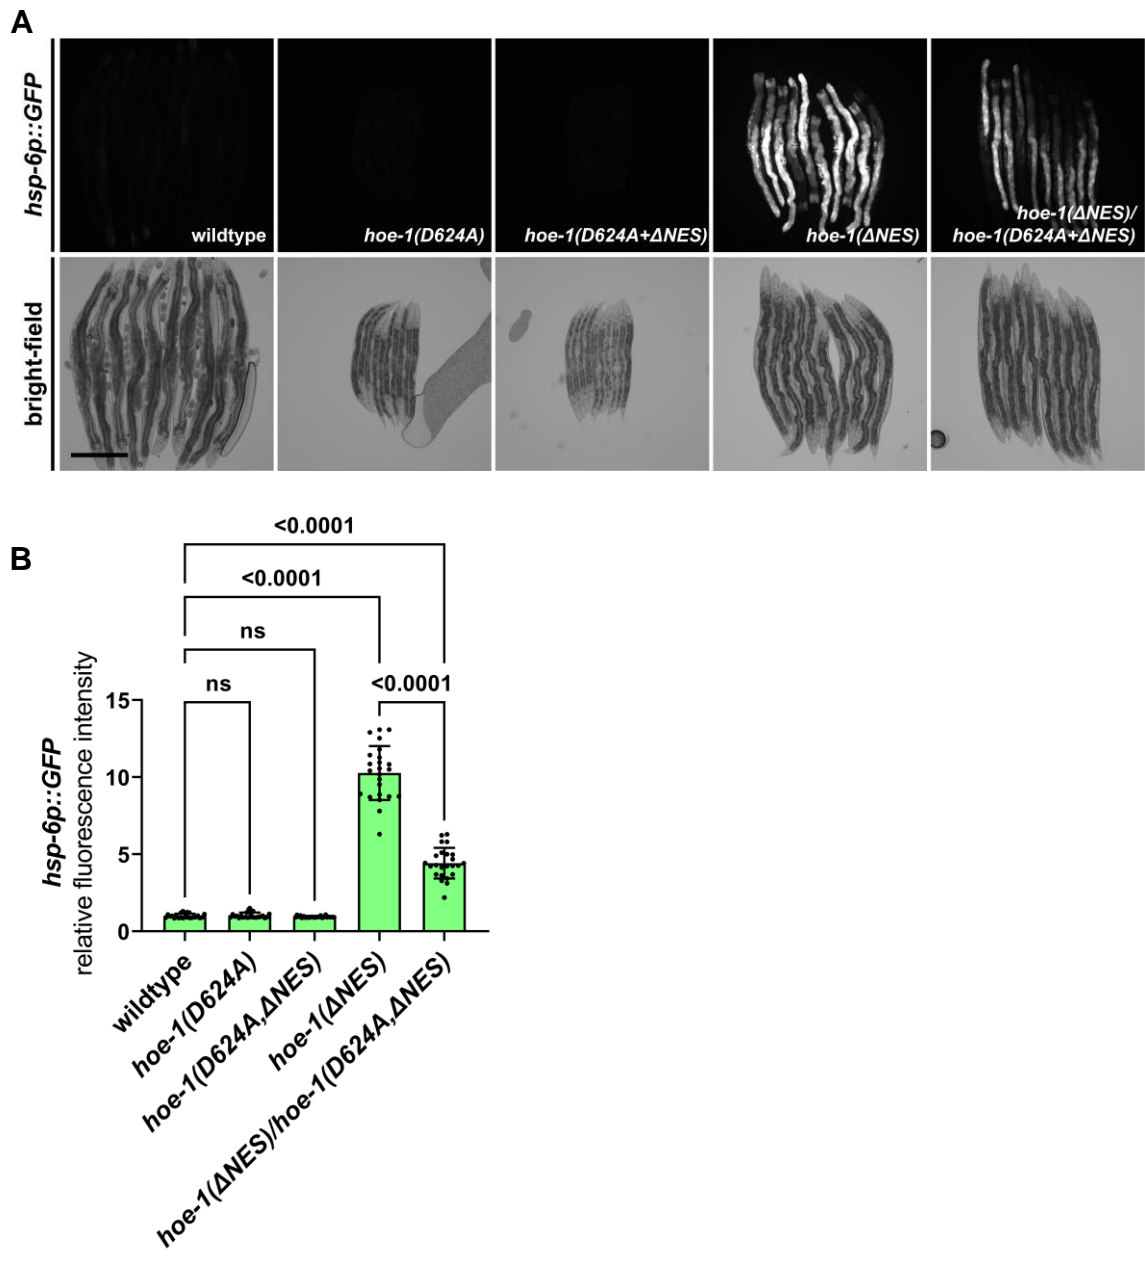

Supplement: supp [file elife-71634-supp-v1.zip]

# Figure 2 – figure supplement 5

A

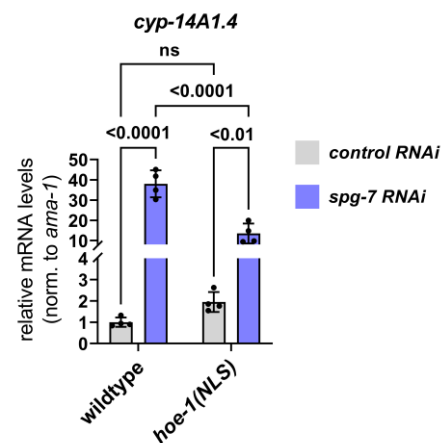

Supplement: supp [file elife-71634-supp-v1.zip]

**Figure 8 – source data 4**

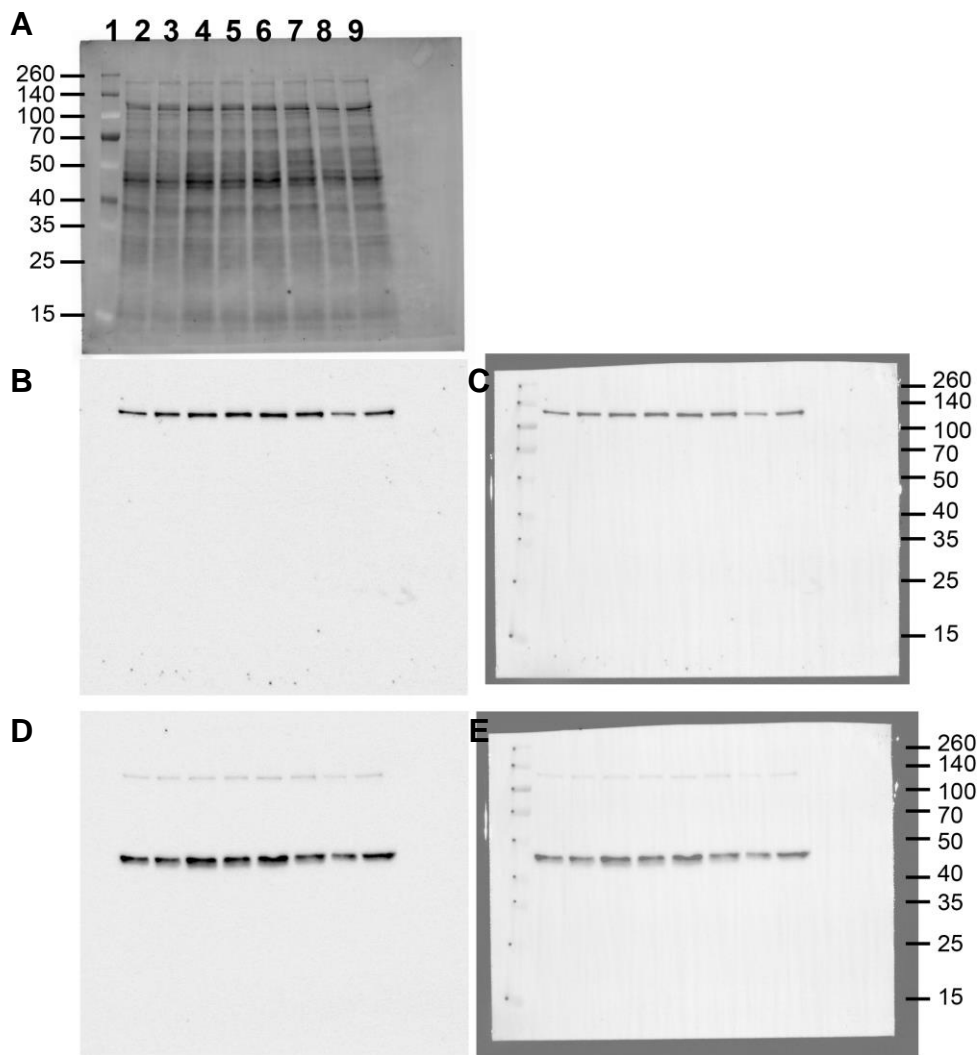

Supplement: supp [file elife-71634-supp-v1.zip]

Figure 3 – figure supplement 4

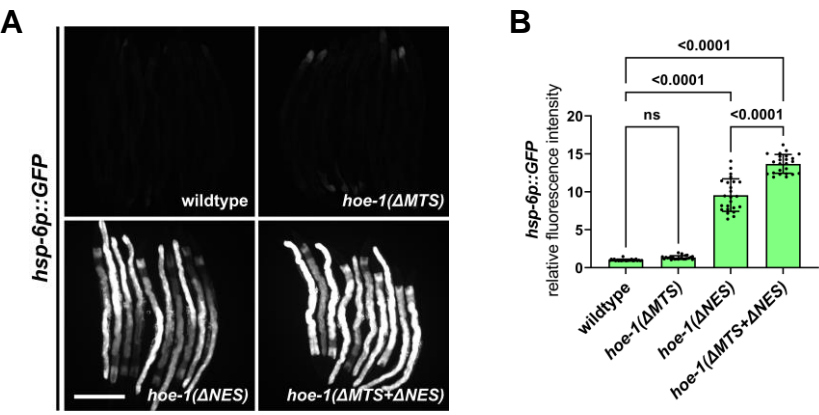

Supplement: supp [file elife-71634-supp-v1.zip]

Figure 8 – figure supplement 1

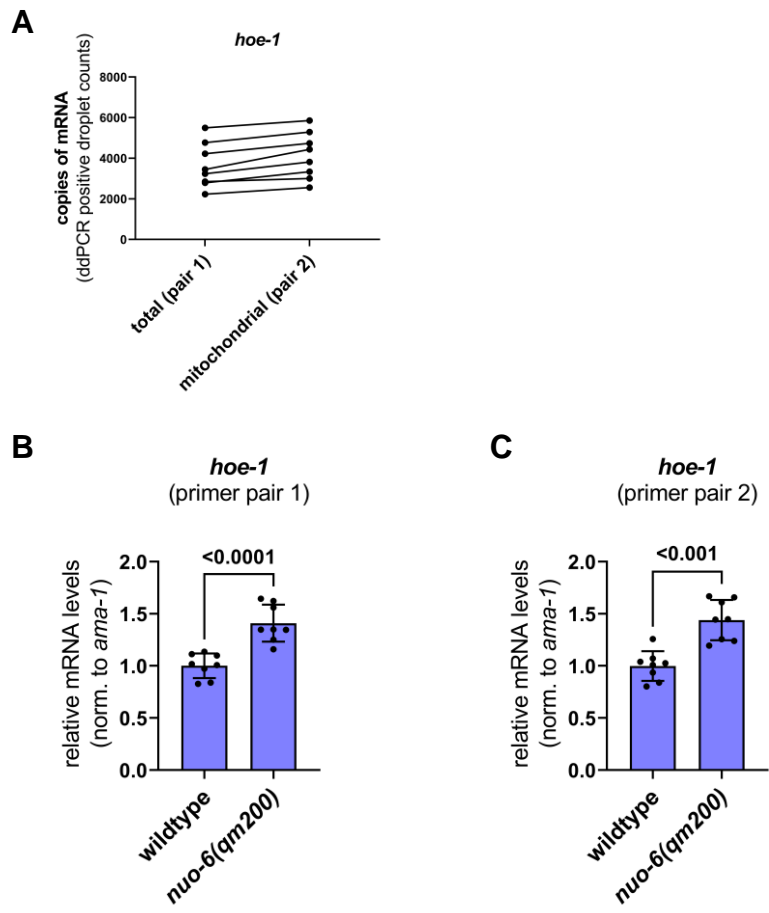

Supplement: supp [file elife-71634-supp-v1.zip]

**Figure 8 – source data 3**

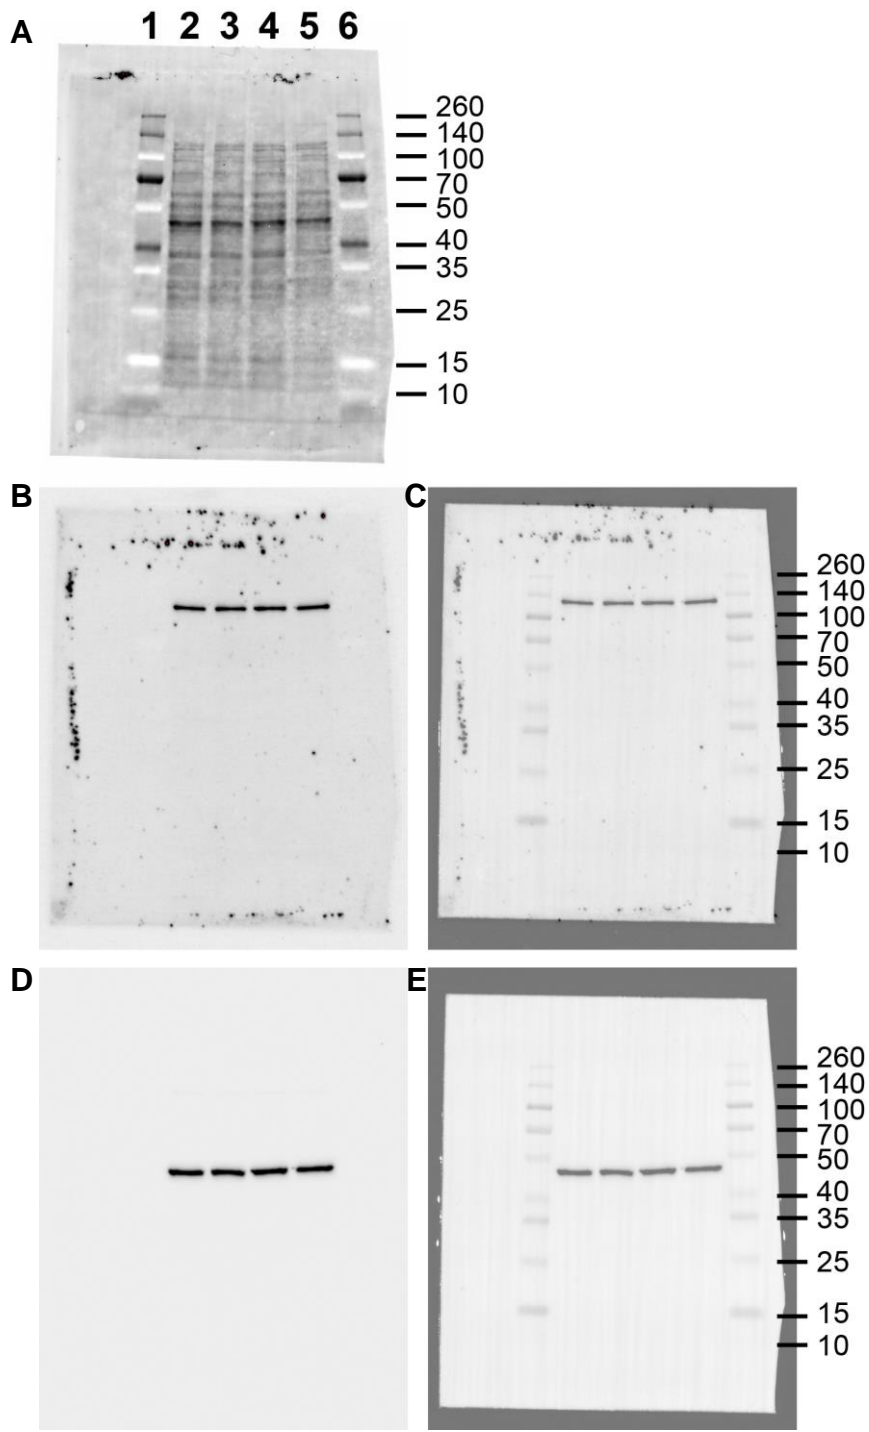

Supplement: supp [file elife-71634-supp-v1.zip]

## Figure 2 – figure supplement 1

A

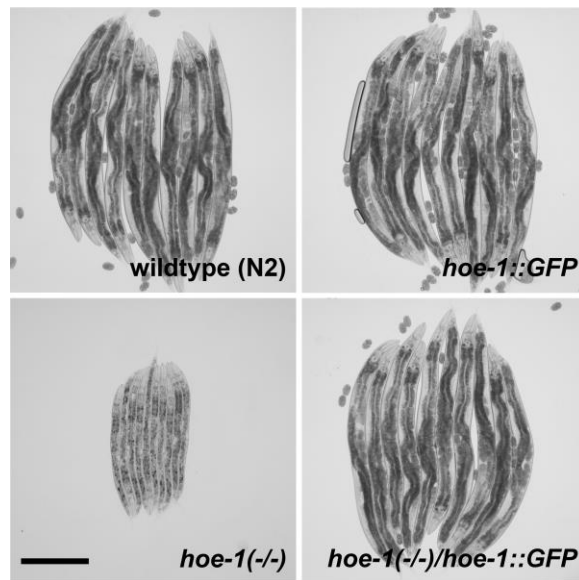

Supplement: supp [file elife-71634-supp-v1.zip]

Figure 3 – figure supplement 5

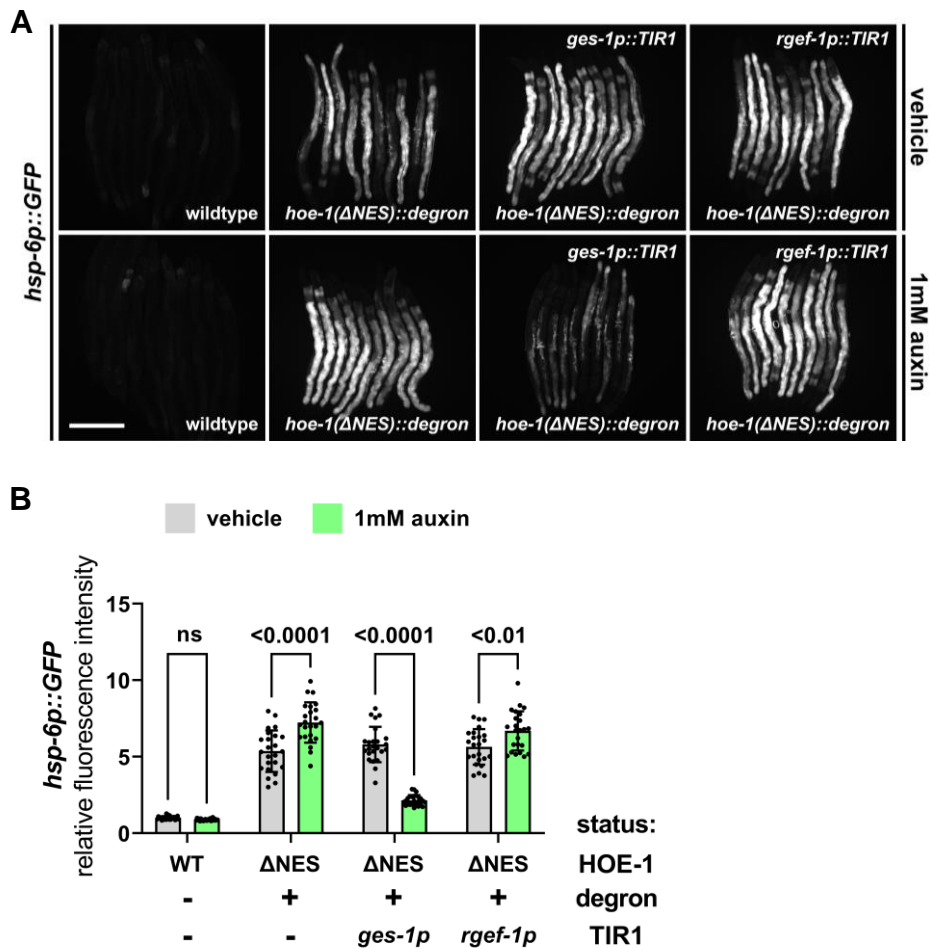

Supplement: supp [file elife-71634-supp-v1.zip]

Figure 5 – figure supplement 1

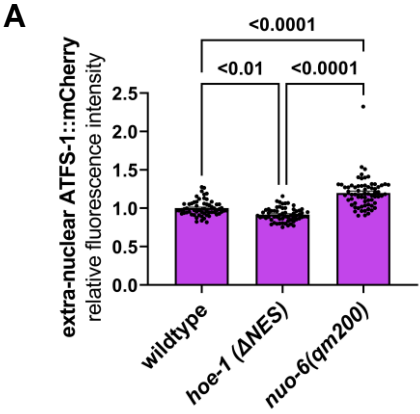

Supplement: supp [file elife-71634-supp-v1.zip]

Figure 8 – figure supplement 2

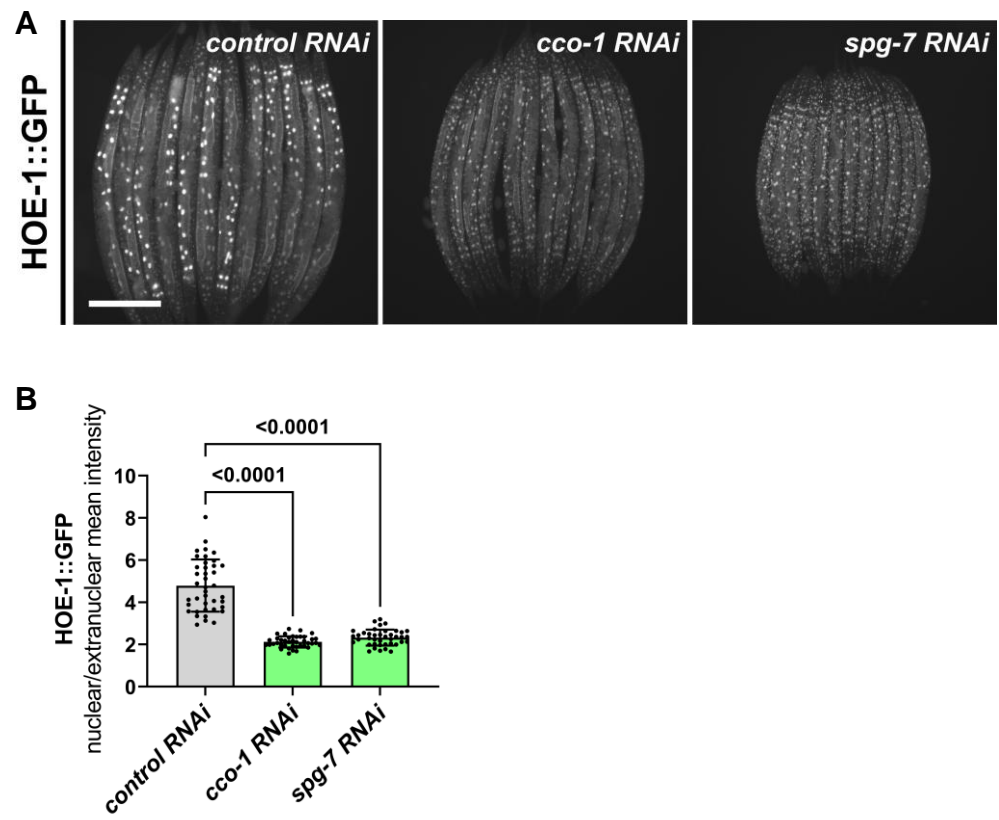

Supplement: supp [file elife-71634-supp-v1.zip]

**Figure 8 – source data 1**

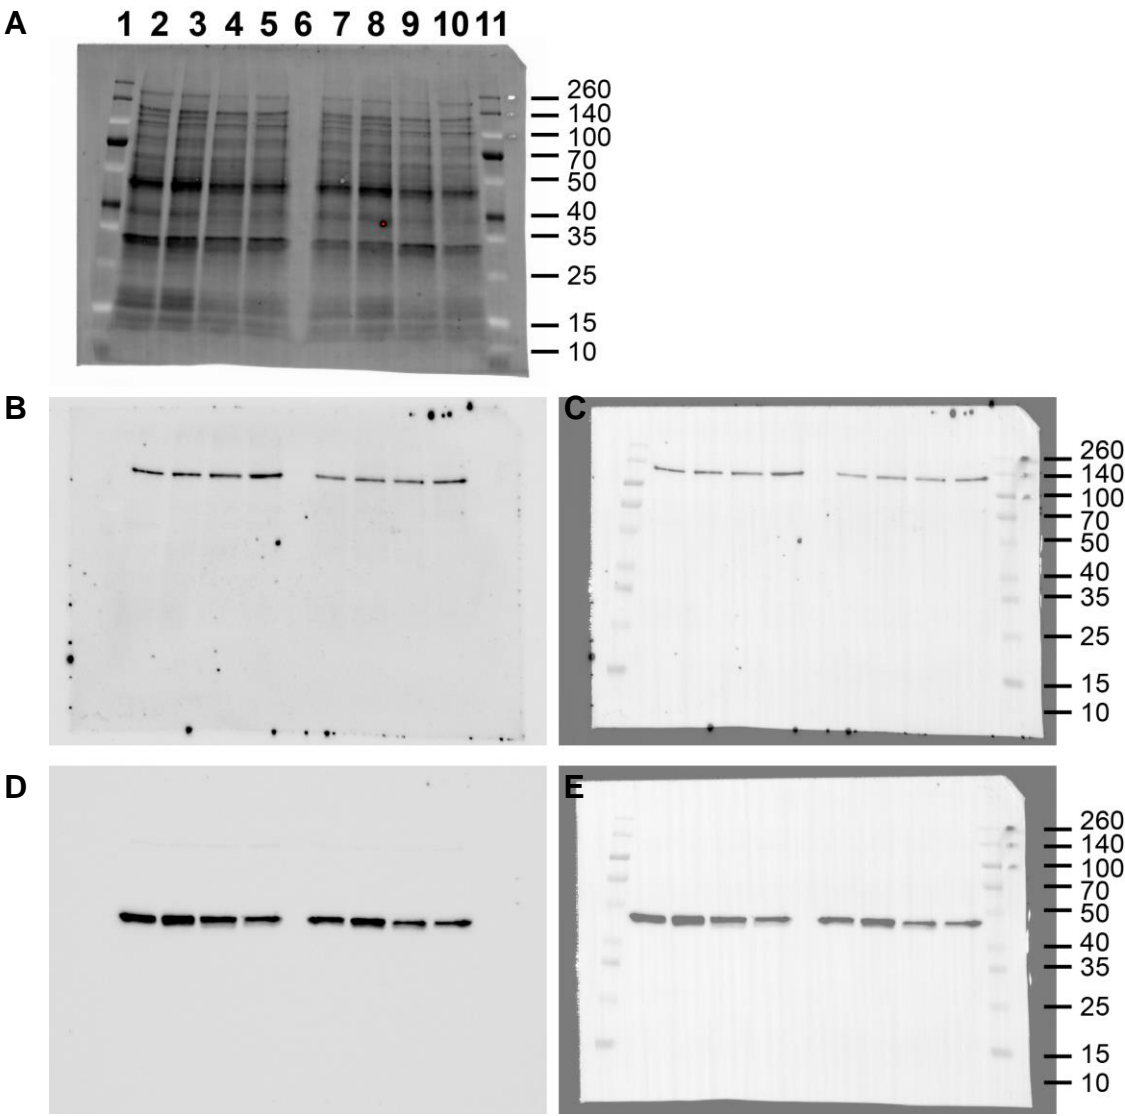

Supplement: supp [file elife-71634-supp-v1.zip]

# Figure 6 – figure supplement 3

A

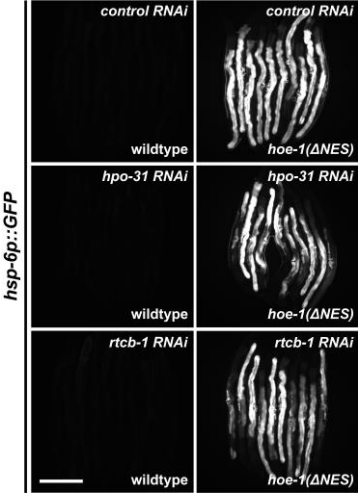

B

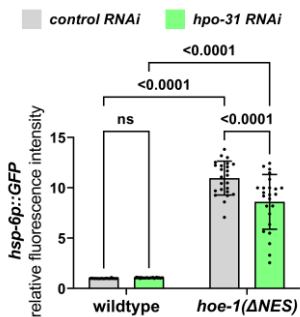

C

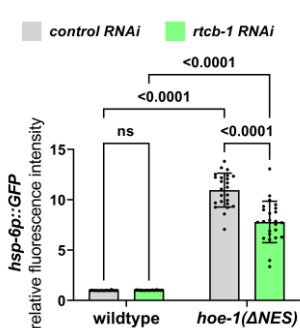

D

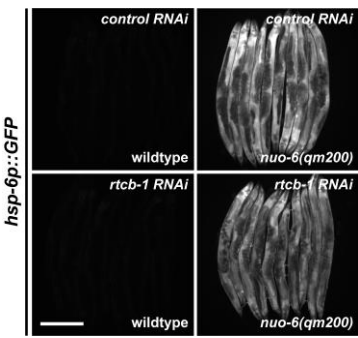

E

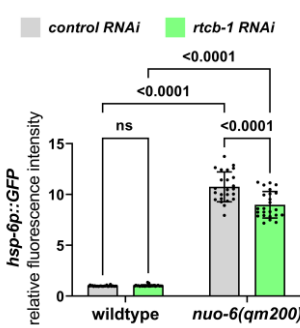

Supplement: supp [file elife-71634-supp-v1.zip]

Figure 3 – figure supplement 2

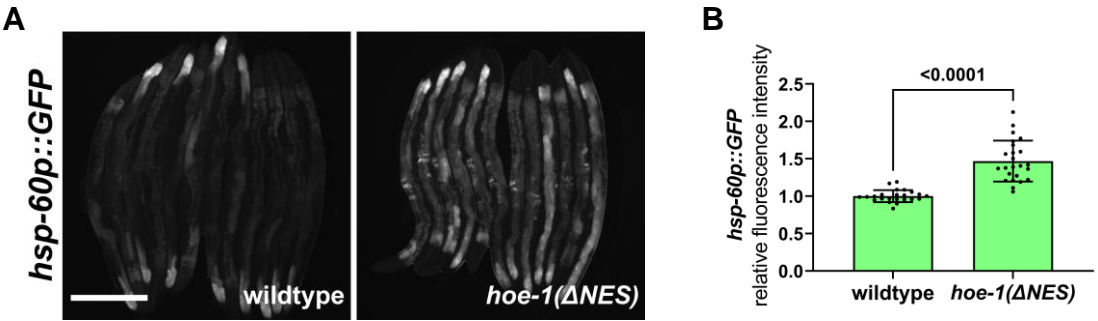

Supplement: supp [file elife-71634-supp-v1.zip]

# Figure 2 – figure supplement 4

A

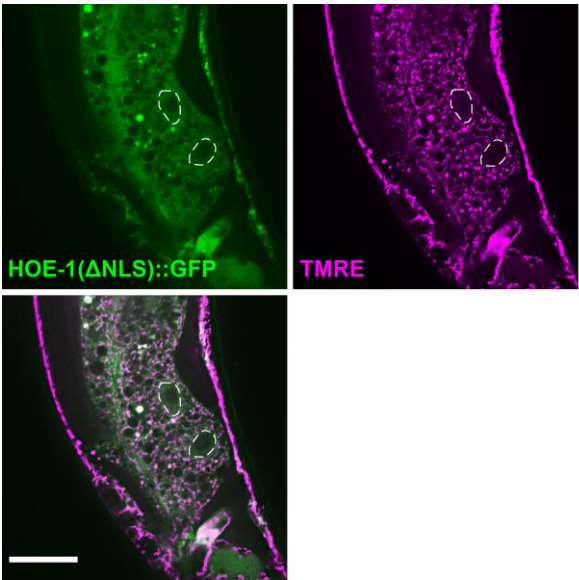

B

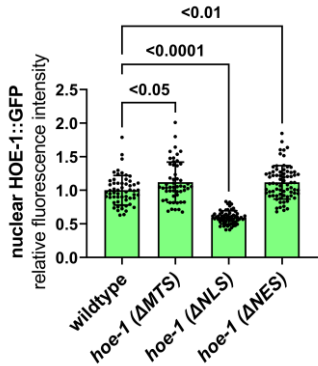

C

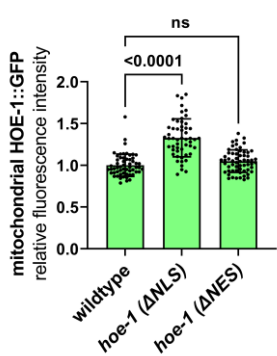

Supplement: supp [file elife-71634-supp-v1.zip]

Figure 3 – figure supplement 3

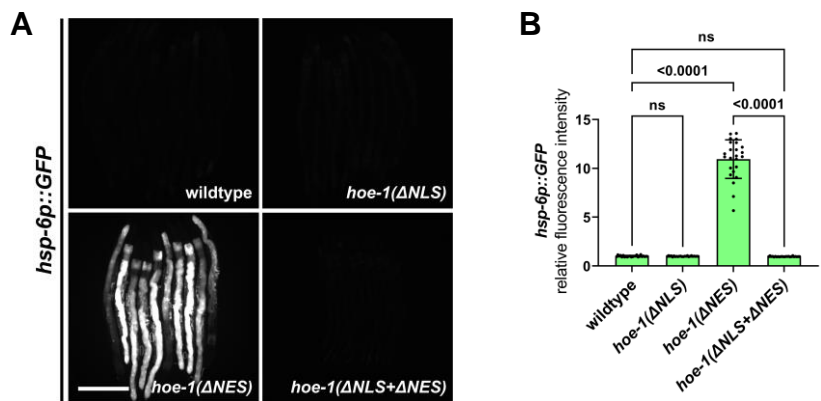

Supplement: supp [file elife-71634-supp-v1.zip]

**Figure 5 – source data 1**

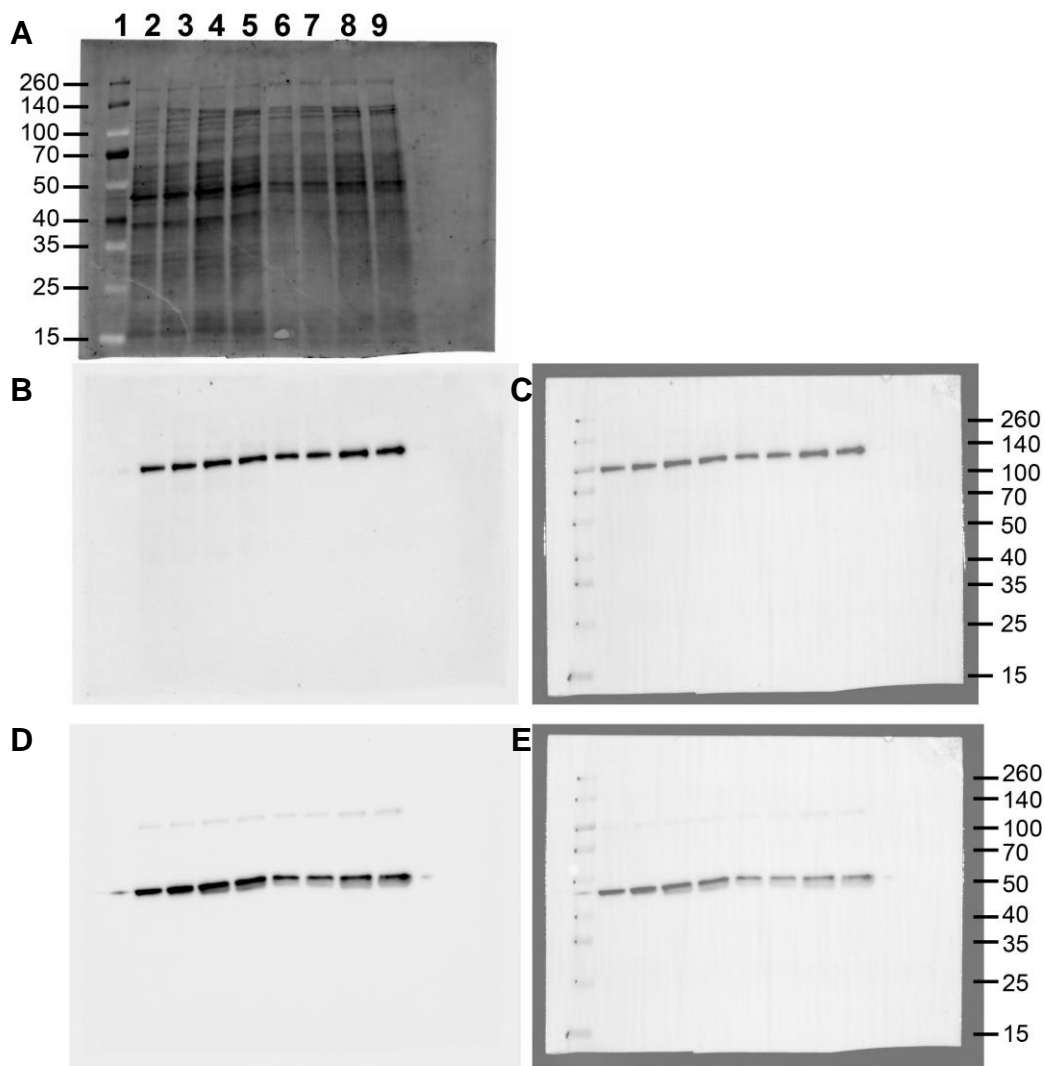

Supplement: supp [file elife-71634-supp-v1.zip]
